# Supplementary material for: Adhesive and Impact-Peel Strength Improvement of Epoxy Resins Modified with Mono and Diamine Functionalized Elastomers
Source: Hindawi journal article supplement (doi:10.1155/2022/2309235), 2022-04-11
Supplement: f1 [file 2309235.f1.docx]

**Adhesive and impact-peel strength improvement of epoxy resins modified with** **mono- and diamine functionalized elastomers**

Mohammed Panthakkal Abdul Muthalif a, Youngson Choe*a

aDepartment of Polymer Science and Chemical Engineering, Pusan National University, Geumjeong-gu, Jangjeong-Dong, Busan 46241, South Korea

*Corresponding author. <Tel:+82515102396>; fax: +82515128634

E-mail: [choe@pusan.ac.kr](mailto:choe@pusan.ac.kr)


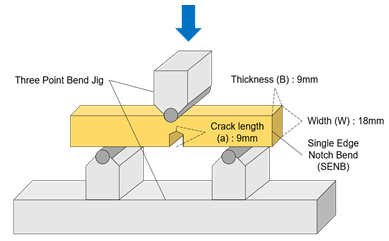


**Figure S1** Schematic diagram of fracture toughness test (three-point bending test).
